# Supplementary material for: Extracellular mRNA transported to the nucleus exerts translation-independent function
Source: PubMed Central journal article supplement (PMC8208975; doi:10.1038/s41467-021-23969-1), 2021-06-16
Supplement: 41467_2021_23969_MOESM1_ESM.pdf [file 41467_2021_23969_MOESM1_ESM.pdf]

# Supplementary Figure 1

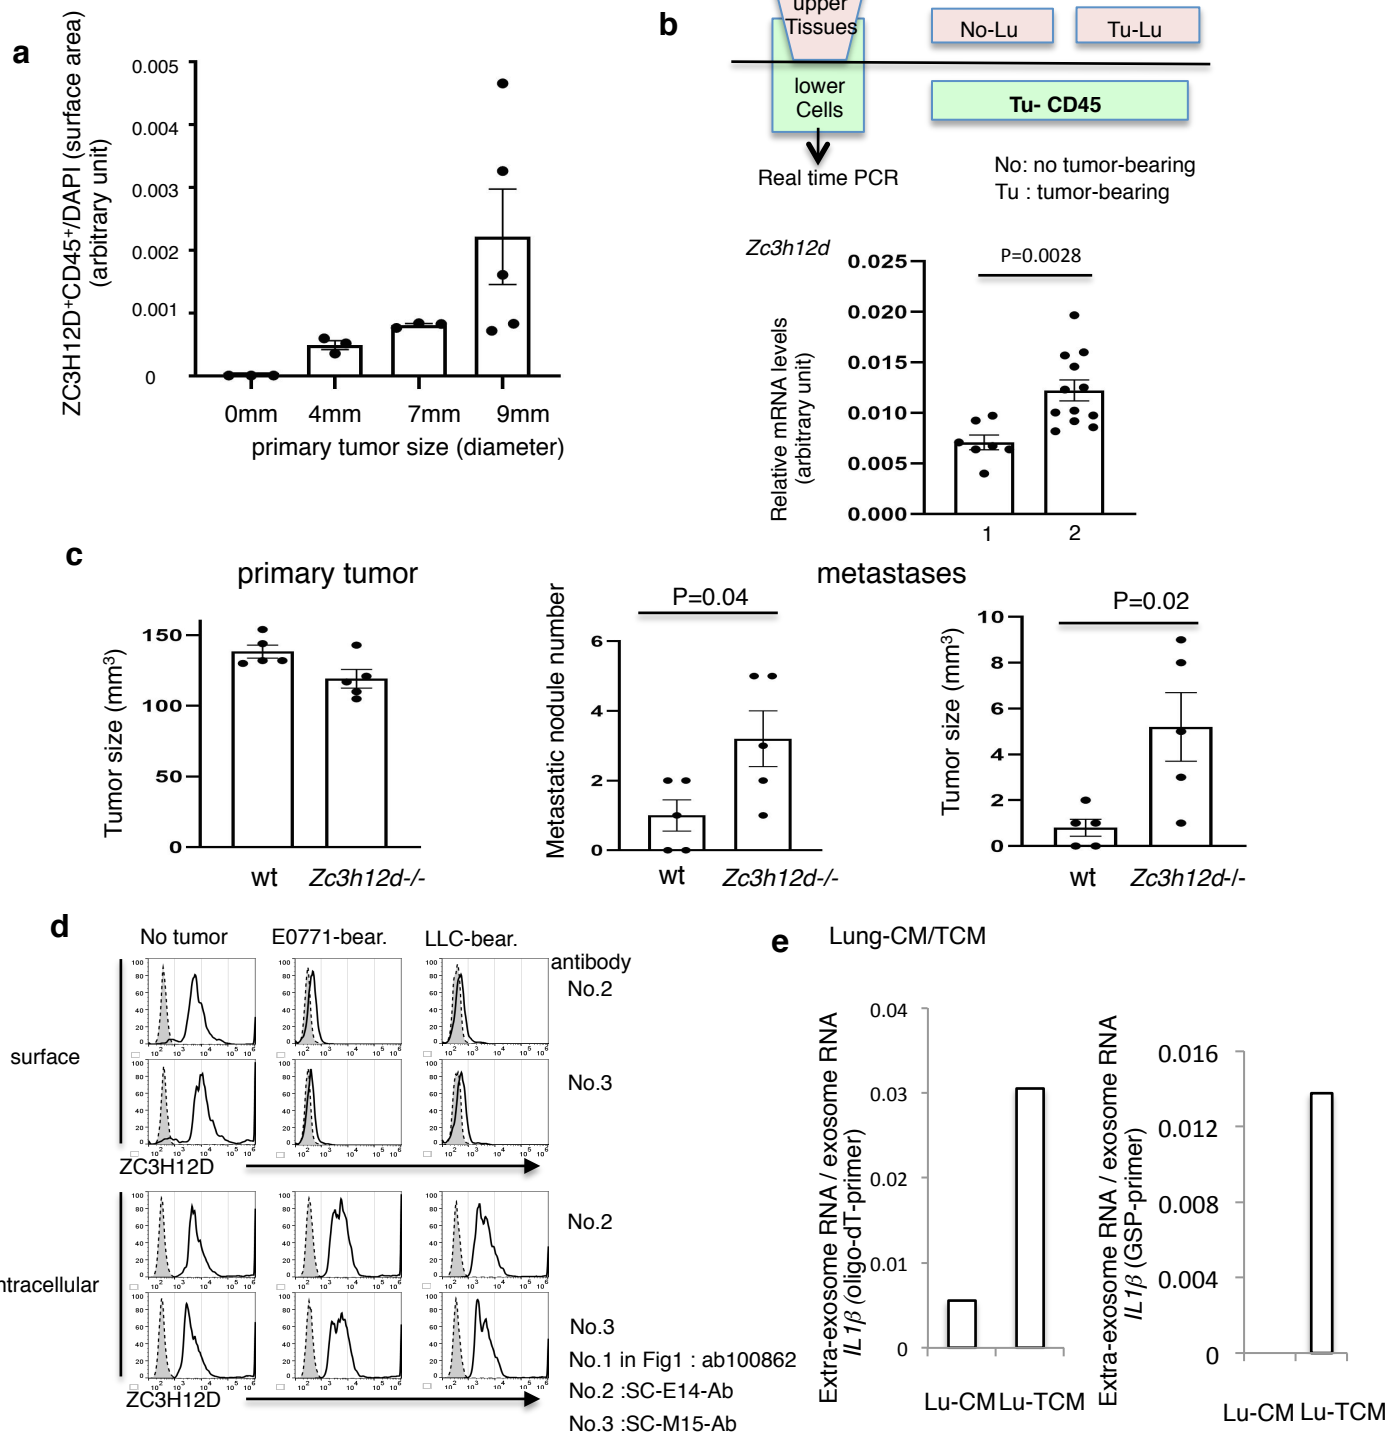

**(a)** ZC3H12D<sup>+</sup> leukocytes increased in E0771-bearing mouse lungs during primary tumor growth. IHC examination was conducted on lung tissue taken from mice with primary tumors of the following sizes: 0 mm ( $n = 3$ ), 4 mm ( $n = 3$ ), 7 mm ( $n = 3$ ), and 9 mm ( $n = 5$ ). **(b)** An assay system used to examine mRNA levels in CD45<sup>+</sup> leukocytes in bottom wells cultured with lung tissues in top wells (top). *Zc3h12d* expression in leukocytes was stimulated by tumor-bearing lungs. The lungs were obtained from mice without tumors ( $n = 7$ ) and tumor-bearing mice ( $n = 12$ ; bottom). **(c)** Primary E0771 tumor growth of wild-type ( $n = 5$ ) and *Zc3h12d*<sup>-/-</sup> ( $n = 5$ ) mice (left). The metastatic nodule number (middle) and total tumor size (right) in each mouse type are presented. **(d)** FACS analysis of surface and intracellular ZC3H12D protein in PBMCs derived from mice without tumors, E0771-bearing mice, and LLC-bearing mice. Three anti-ZC3H12D antibodies were used. **(e)** qPCR analysis of *mIL1 $\beta$* -mRNA. Ratio of extraexosome RNA compared to exosome RNA in mouse lung culture medium with control CM or TCM. RT was carried out using oligo(dT) (left) and GSP (right) primers. In the graphs, the averages  $\pm$  SEM, and results of a Student's t-tests (two-sided) or one-way ANOVA with Bonferroni correction are shown. The P values are shown in the figure. Source data are provided as a Source Data File.

## Supplementary Figure 2

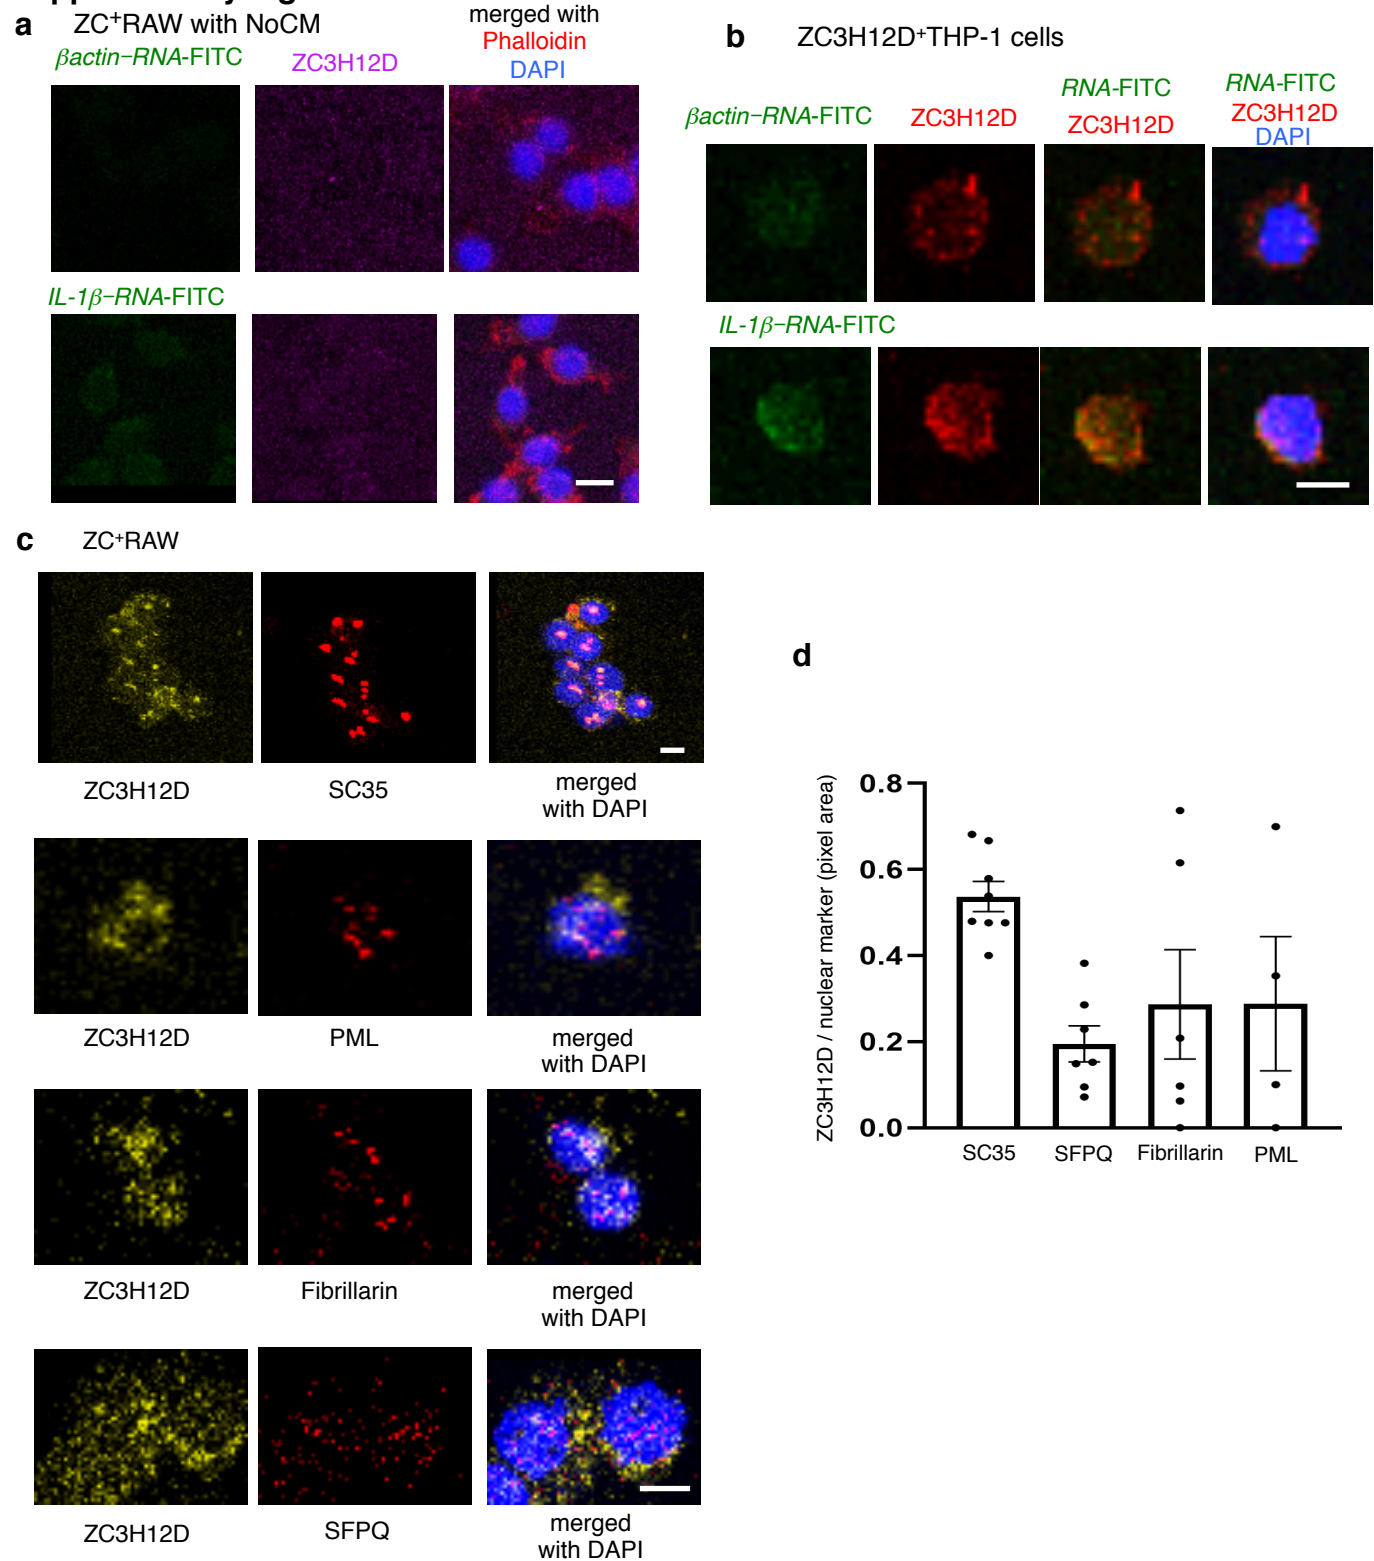

**(a)** Representative images showing that ZC3H12D on the surface of ZC<sup>+</sup>RAW was not induced by NoCM. **(b)** Colocalization of *IL1β*-mRNA-FITC and ZC3H12D on ZC3H12D+THP1 cells. **(c)** IHC analysis of colocalization of ZC3H12D and a speckle marker, SC35, in the nucleus of *IL1β*-mRNA-stimulated ZC<sup>+</sup>RAW cells. In comparison to SC35, IHC analysis reveals that the ZC3H12D signal was less colocalized with another nuclear body marker (PML, fibrillarin, and SFPQ) in the nucleus of *IL1β*-mRNA-stimulated ZC<sup>+</sup>RAW cells. Anti-PML, fibrillarin, and SFPQ antibodies are for PML body (PML), nucleolus, and paraspeckle, respectively. **(d)** Quantitative analysis of colocalized signals of ZC3H12D and nuclear body markers. (n = 8, 8, 7 and 4 wells for SC35, SFPQ, Fibrillarin and PML, respectively). Bars, 5  $\mu$ m. In the graphs, the averages  $\pm$  SEM, and the results of one-way ANOVA with Bonferroni correction are shown. Source data are provided as a Source Data File.

## Supplementary Figure 3

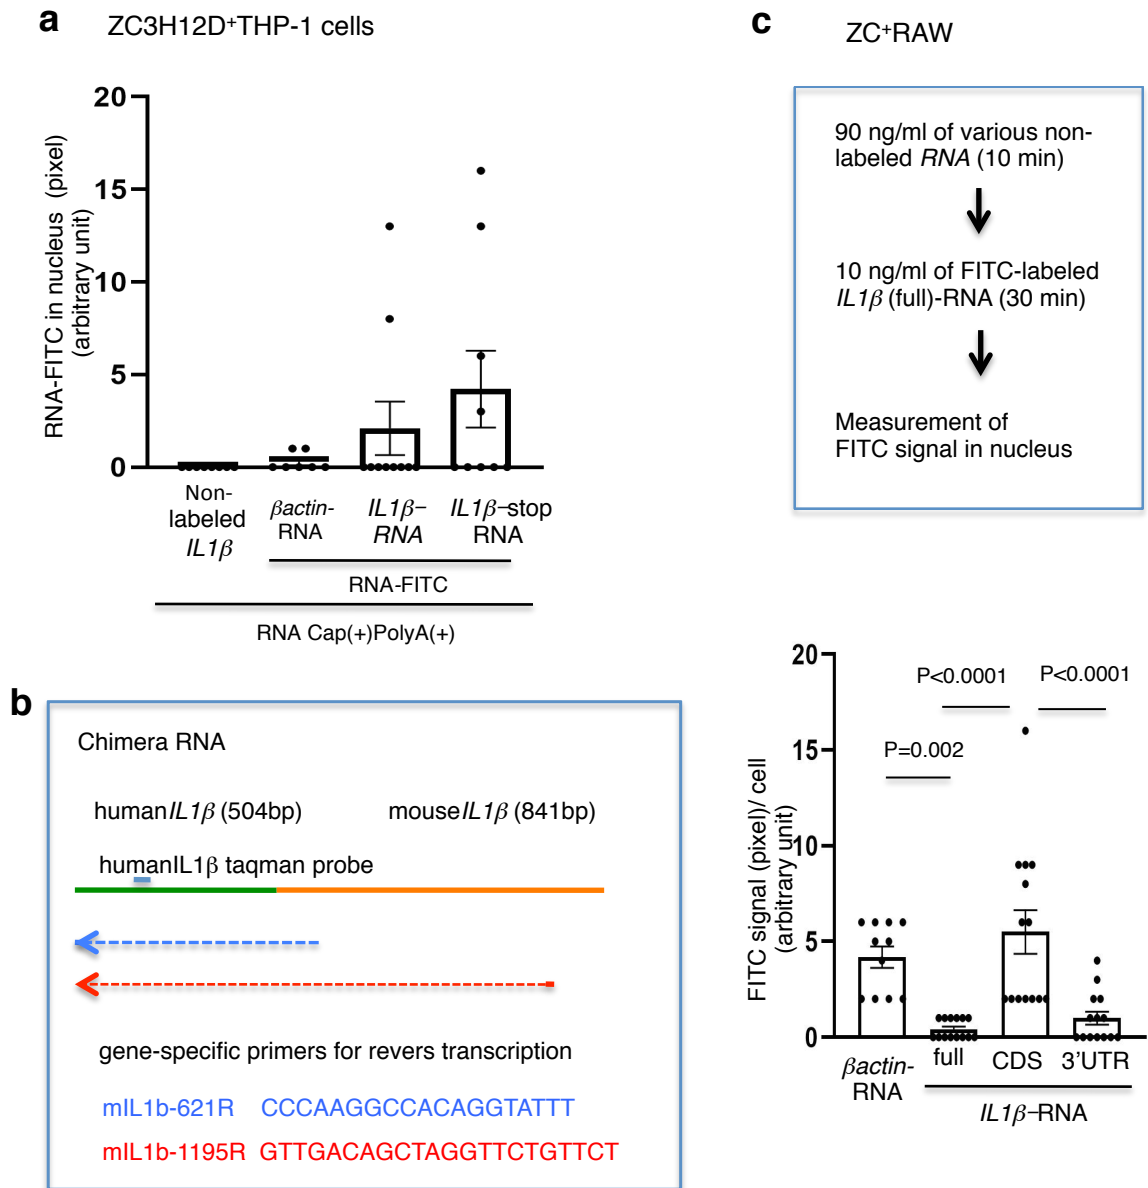

**(a)** Quantitative analysis of RNA-FITC in the nucleus of ZC3H12D+THP1 cells after application of 10 ng/mL nonlabeled *IL1β*-mRNA, FITC-labeled *βactin*-mRNA, *IL1β*-mRNA, and *IL1β*-stop-mRNA with CP (n = 8, 7, 10 and 9 cells for non-labeled *IL1β*-RNA, FITC-labeled- *βactin*-RNA, *IL1β*-RNA and *IL1β*-stop-RNA, respectively. Each cell image is composed of 15-stacked 3D images). **(b)** Biochemical detection system for RNA uptake in the nucleus of mouse ZC+RAW cells using human-mouse-chimera *IL1β*-mRNA. Purified RNA from nuclear and cytoplasmic fractions were used as templates for reverse transcription with mGSPs. cDNAs were subjected to real-time PCR analysis using an h/*IL1β*-specific TaqMan probe as shown above. Note that this probe does not detect endogenous m/*IL1β*. **(c)** Competition assay for *IL1β*-mRNA uptake in the nucleus of ZC+RAW cells. The assay scheme is presented on top. The uptake of *IL1β*-full was inhibited by pretreatment with the 3'-UTR (bottom). Averages (n = 11, 14, 14 and 14 cells for *βactin*-RNA, full length, CDS, and 3'UTR of *IL1β*-RNA, respectively. Each cell image is composed of 15-stacked 3D images) are shown. In the graphs, the averages ± SEM, and the results of one-way ANOVA with Bonferroni correction are shown. The P values are shown in the figure. Source data are provided as a Source Data File.

**Supplementary Figure 4**

**a**

|              |                                           |                                                    |
|--------------|-------------------------------------------|----------------------------------------------------|
| EMSA Probe 1 | <i>mIL1<math>\beta</math></i> (1000-1050) | CGGCCAAGACAGGUCGCUCAGGGUCACAAGAAACCAUGGCACAUUCUGUU |
| EMSA Probe 2 | <i>mIL1<math>\beta</math></i> (1025-1075) | ACAAGAAACCAUGGCACAUUCUGUUCAAAGAGAGCCUGUGUUUCCUCCU  |
| EMSA Probe 3 | <i>mIL1<math>\beta</math></i> (1050-1100) | CAAAGAGAGCCUGUGUUUCCUCCUUGCCUCUGAUGGGCAACCACUJACC  |
| EMSA Probe 4 | <i>mIL1<math>\beta</math></i> (1075-1125) | UGCCUCUGAUGGGCAACCACUJACCUAUUUAUUUAUGUAUUUAUUGAUUG |
| EMSA Probe 5 | <i>mIL1<math>\beta</math></i> (1100-1150) | UAUUUAUUUAUGUAUUUAUUGAUUGGUUGAUCUAUUUAAGUUGAUUCAAG |
| EMSA Probe 6 | <i>mIL1<math>\beta</math></i> (1125-1175) | GUUGAUCUAUUUAAGUUGAUUCAAGGGGACAUUAGGCAGCACUCUCUAGA |
| EMSA Probe 7 | <i>mIL1<math>\beta</math></i> (1150-1200) | GGGACAUUAGGCAGCACUCUCUAGAACAGAACCUAGCUGUCAACGUGUGG |
| EMSA Probe 8 | <i>mIL1<math>\beta</math></i> (1175-1225) | ACAGAACCUAGCUGUCAACGUGUGGGGAUGAAUUGGUCAUAGCCCGCAC  |
| EMSA Probe 9 | <i>mIL1<math>\beta</math></i> (1200-1250) | GGGAUGAAUUGGUCAUAGCCCGCACUGAGGUCUUUCAUUGAAGCUGAGAA |

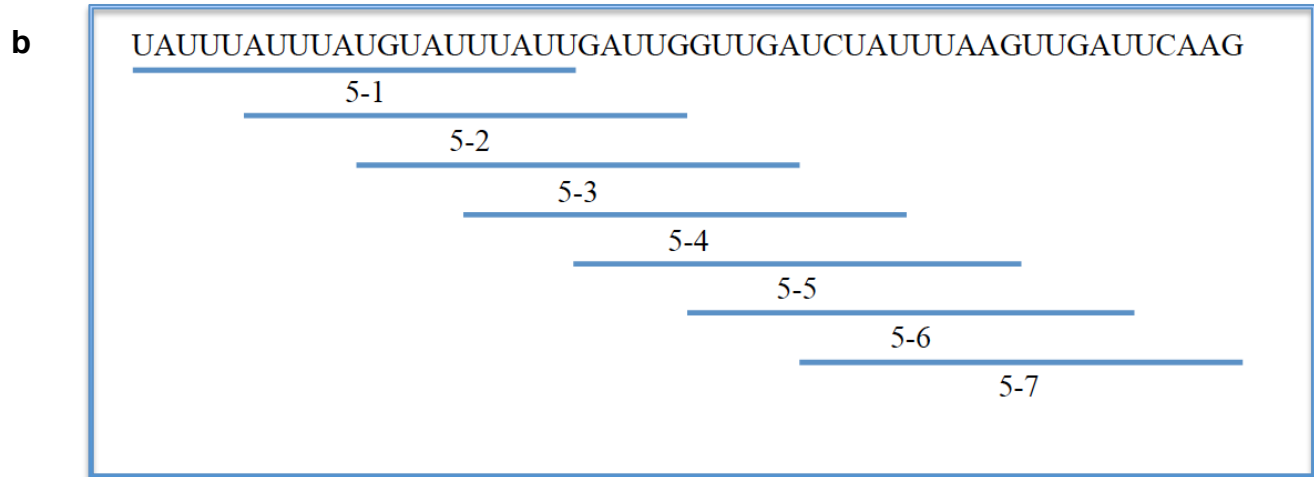

**(a)** EMSA probes are described in this table. Each number shows the base position in the canonical *mIL1 $\beta$*  transcript.  
**(b)** Nucleotide sequence of EMSA probe 5 and short competitors (5-1–5-7).

## Supplementary Figure 5

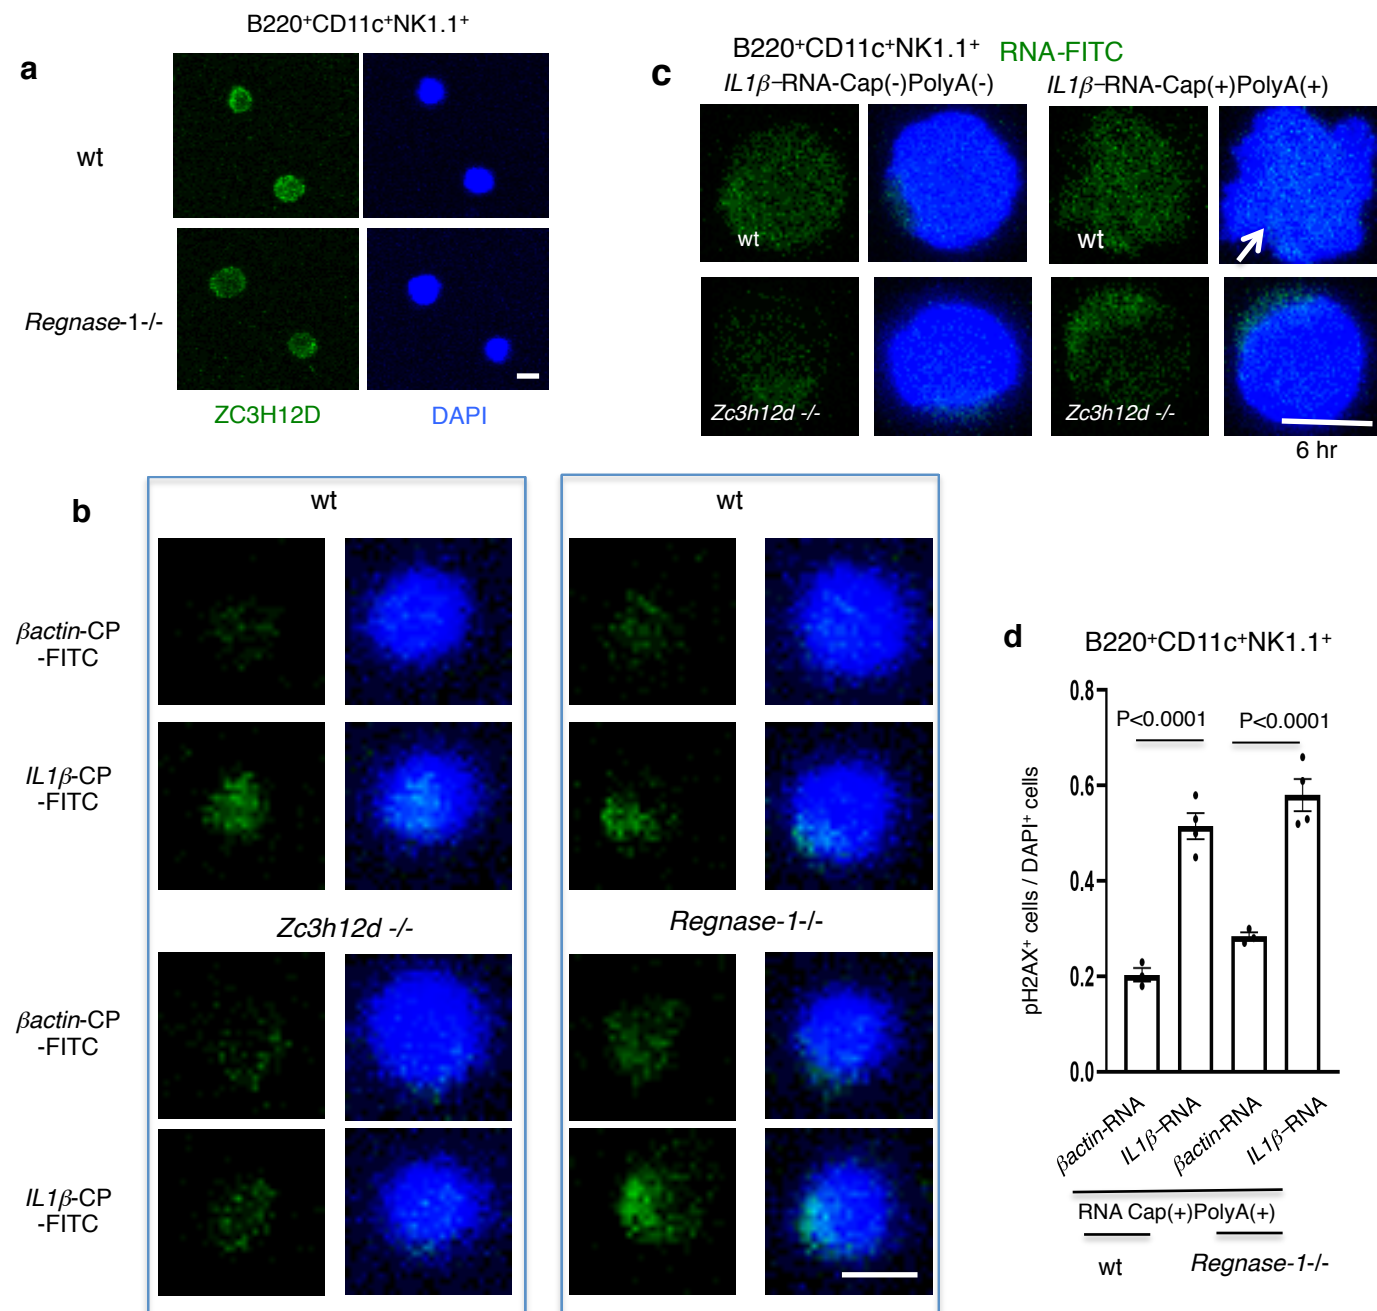

**(a)** Representative ZC3H12D expression in B220<sup>+</sup>CD11c<sup>+</sup>NK1.1<sup>+</sup>NK cells derived from wild-type and *Regnase-1*<sup>-/-</sup> (*Zc3h12a*<sup>-/-</sup>) spleens. 3D image analysis using confocal microscopy (Z-stack: 15 images) is presented. **(b)** Signal of RNA-FITC shown in B220<sup>+</sup>CD11c<sup>+</sup>NK1.1<sup>+</sup> cells derived from wild-type, *Zc3h12d*<sup>-/-</sup>, and *Regnase-1*<sup>-/-</sup> mice 3 h after application of 10 ng/mL *beta*actin-mRNA-CP-FITC and *IL1* $\beta$ -mRNA-CP-FITC. The wild littermate was used for each knockout mouse. 3D image analysis using confocal microscopy (Z-stack: 15 images) is presented. **(c)** Representative photo showing the irregular shape of the nucleus 6 h after the uptake of *IL1* $\beta$ -RNA-CP in B220<sup>+</sup>CD11c<sup>+</sup>NK1.1<sup>+</sup> cells derived from wild-type mice (arrows). Experiments were repeated twice with similar results. **(d)** Quantitative IHC analysis for phospho-H2AX in the nucleus of B220<sup>+</sup>CD11c<sup>+</sup>NK1.1<sup>+</sup> cells from wild-type and *Regnase-1*<sup>-/-</sup> 3 h after application of *beta*actin-mRNA and *IL1* $\beta$ -mRNA (n = 3 and 4 wells for *beta*actin-mRNA and *IL1* $\beta$ -mRNA, respectively). Bar, 5  $\mu$ m. In the graphs, the averages  $\pm$  SEM, and the results of one-way ANOVA with Bonferroni correction are shown. The P values are shown in the figure. Source data are provided as a Source Data File.

## Supplementary Figure 6

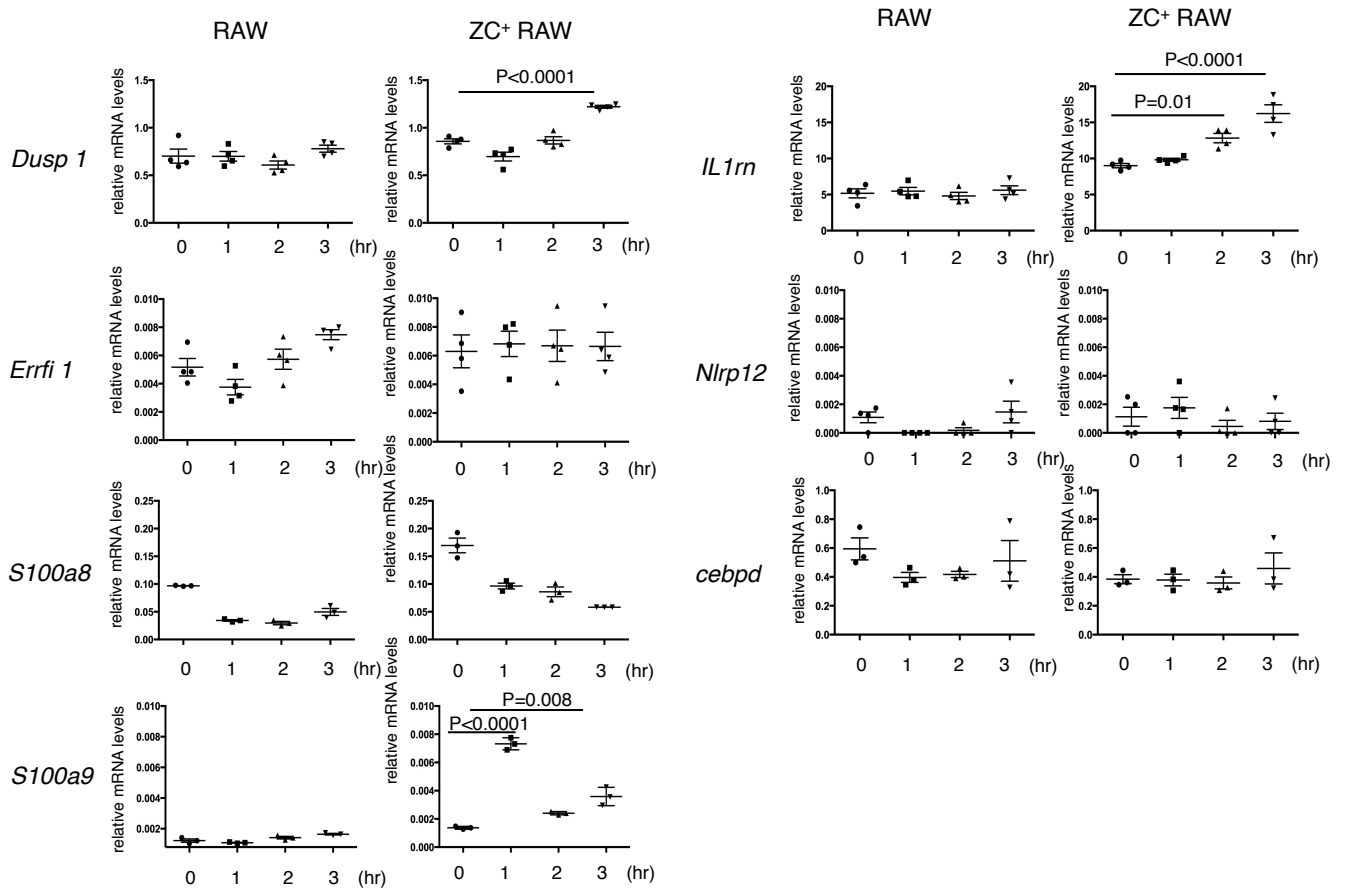

Time course of mRNA expression after treatment with *IL1β*-RNA. Vertical axes indicate the relative mRNA levels normalized by *βactin* (n = 4 biologically independent samples for *Dusp1*, *IL1rn*, *Errfi1* and *Nlrp12* and n = 3 biologically independent samples for *S100a8*, *S100a9* and *cebpd*). In the graphs, averages ± SEM and the results of one-way ANOVA with Bonferroni correction are shown. The P values are shown in the figure. Source data are provided as a Source Data File.

## Supplementary Figure 7

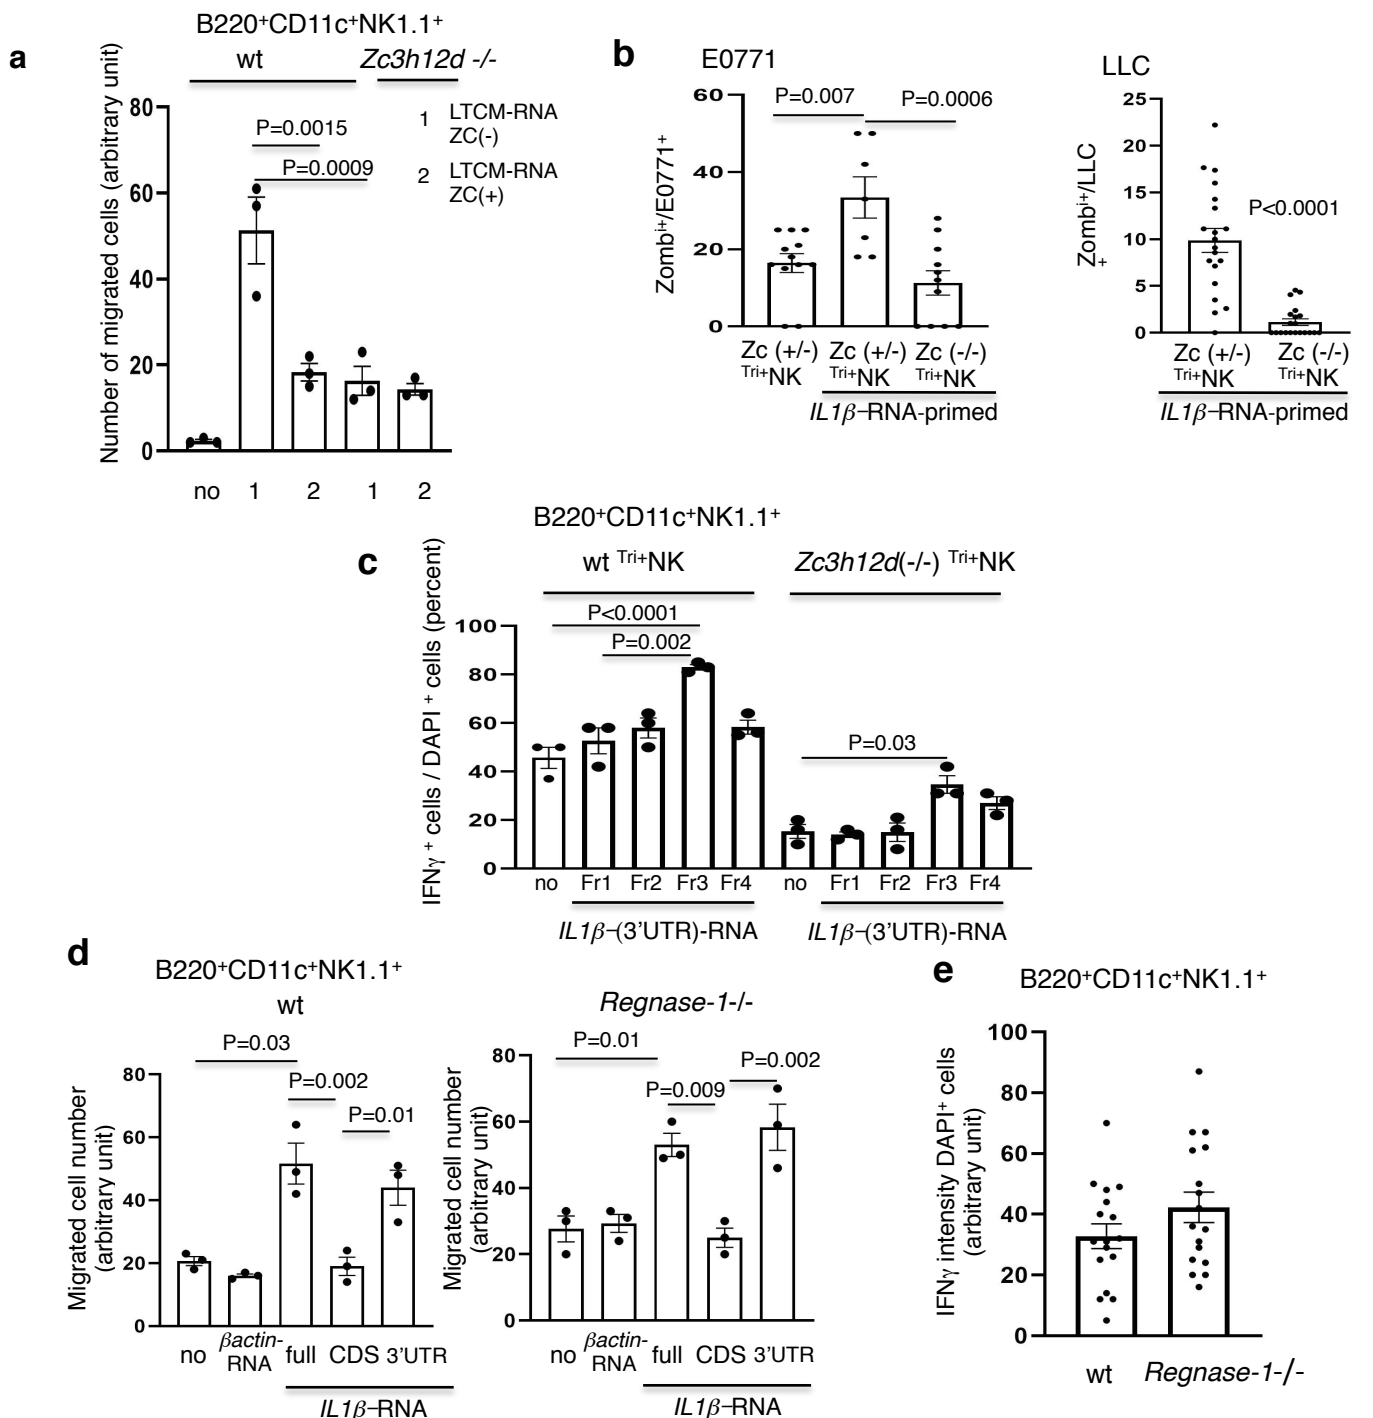

**(a)** Migration assay for RNA derived from TCM-depleted ZC3H12D-binding RNA. RNA samples were obtained from LTCM passed through a no protein column (No. 1) and a ZC3H12D protein column (No. 2). No, zero RNA. The number of migrated B220<sup>+</sup>CD11c<sup>+</sup>NK1.1<sup>+</sup> cells of wild and *Zc3h12d*<sup>-/-</sup> mice are shown (n = 3 wells per group). **(b)** Tumoricidal assay *in vitro* after coincubation of tumor cells with IL1 $\beta$ -mRNA-primed B220<sup>+</sup>CD11c<sup>+</sup>NK1.1<sup>+</sup> cells. *Zc3h12d*<sup>+/-</sup> and *Zc3h12d*<sup>-/-</sup> mice were same littermates. B220<sup>+</sup>CD11c<sup>+</sup>NK1.1<sup>+</sup> is shown as Tri+NK. (left, n = 12, 7 and 11 wells for Zc(+/-), IL1 $\beta$ -RNA-primed Zc(+/-) and Zc(-/-), respectively. right, n = 20 wells). **(c)** Upregulation of IFN- $\gamma$  in B220<sup>+</sup>CD11c<sup>+</sup>NK1.1<sup>+</sup> cells from TCM-stimulated wild-type or *Zc3h12d*<sup>-/-</sup> mice with four fragments of 3'-UTR (n = 3 culture dishes per group). **(d)** Migration assay for IL1 $\beta$ -mRNA domains and  *$\beta$ actin*-mRNA using wild type and *Zc3h12a*<sup>-/-</sup> (*Regnase-1*<sup>-/-</sup>) mice B220<sup>+</sup>CD11c<sup>+</sup>NK1.1<sup>+</sup> cells (10 ng/mL; n = 3 wells per group). **(e)** IFN- $\gamma$  in B220<sup>+</sup>CD11c<sup>+</sup>NK1.1<sup>+</sup> cells from wild-type or *Regnase-1*<sup>-/-</sup> mice with IL1 $\beta$ -mRNA (n=17 cells from 2 wild-type and 3 *Regnase-1*<sup>-/-</sup> mice). In the graphs, averages  $\pm$  SEM and the results of a Student's t-test or one-way ANOVA with Bonferroni correction are shown. The P values are shown in the figure. Source data are provided as a Source Data File.



# Supplementary Figure 8

**a**

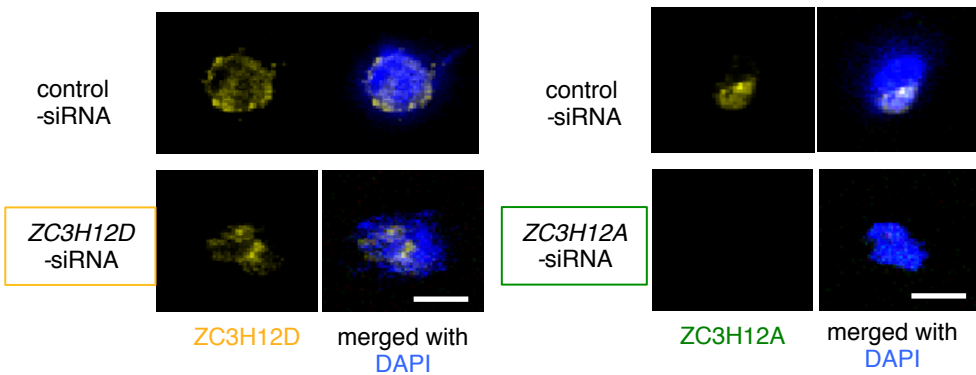

**b**

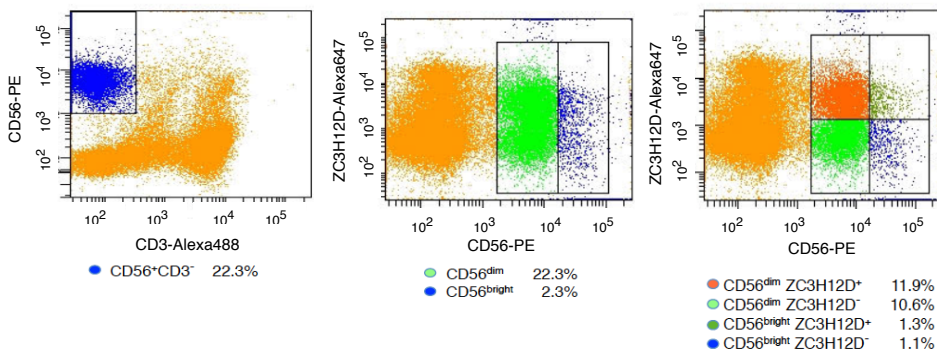

**c**

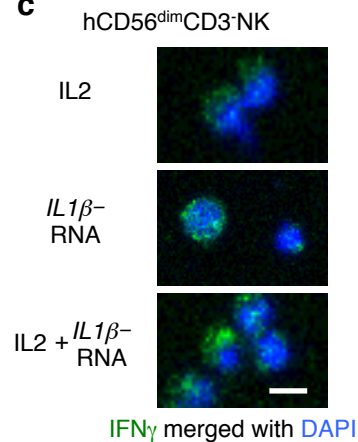

**d** hCD56<sup>bright</sup>CD3-NK

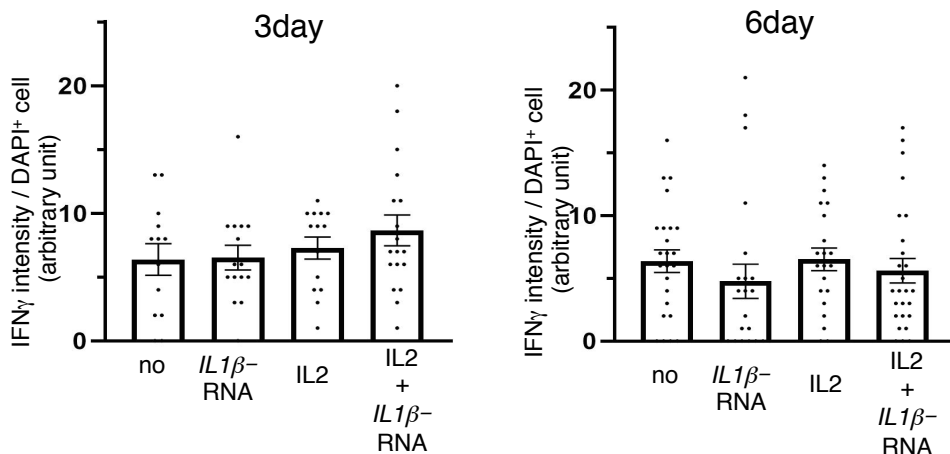

**e** hCD56<sup>bright</sup>CD3-NK

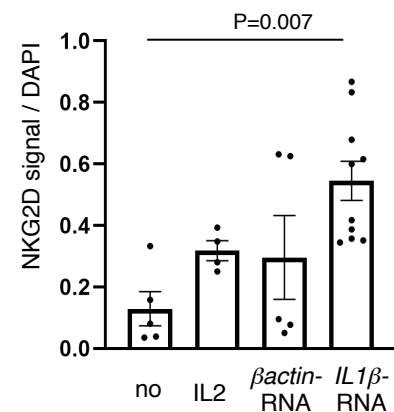

**(a)** Knockdown of ZC3H12D and ZC3H12A proteins using siRNA in human NK cells. Representative 3D images with IHC staining are presented. Images show the reduction of ZC3H12D and ZC3H12A expression in CD56<sup>+</sup>CD3<sup>-</sup>NK cells 24 h after electroporation of siRNA. Bar, 5  $\mu$ m. Experiment was repeated once with similar result. **(b)** FACS analysis of surface ZC3H12D protein in CD56<sup>bright</sup> and CD56<sup>dim</sup> NK cells derived from hPBMCs. Gating strategy using anti-ZC3H12D antibody was shown in Supplementary Figure 10. **(c)** Representative photo of IFN- $\gamma$  staining 6 days after treatment with hIL1 $\beta$ -mRNA and IL2 protein for MDAMB231-TCM-pretreated CD56<sup>dim</sup>CD3<sup>-</sup>NK cells from PBMC. Ten stacked confocal images are shown. Bar, 5  $\mu$ m. **(d)** IHC analysis of IFN- $\gamma$  production 3 and 6 days after treatment with hIL1 $\beta$ -mRNA and IL2 protein for MDAMB231-TCM-pretreated CD56<sup>bright</sup>CD3<sup>-</sup>NK cells (bottom left, n = 13, 15, 14 and 18 cells for no, IL1 $\beta$ -RNA, and IL2 protein, and IL1 $\beta$ -RNA plus IL2 protein, respectively. bottom right, n = 34, 21, 21 and 26 cells for no, IL1 $\beta$ -RNA, and IL2 protein, and IL1 $\beta$ -RNA plus IL2 protein, respectively). **(e)** NKG2D expression in CD56<sup>bright</sup>CD3<sup>-</sup>NK cells 6 days after incubation with RNA (n = 5, 4, 5 and 10 wells for no, IL2 protein,  $\beta$ actin-RNA and IL1 $\beta$ -RNA, respectively). In the graphs, averages  $\pm$  SEM and the results of one-way ANOVA with Bonferroni correction are shown. The P values are shown in the figure. Source data are provided as a Source Data File.



# Supplementary Figure 9 - Repeated Data

## Figure 1d

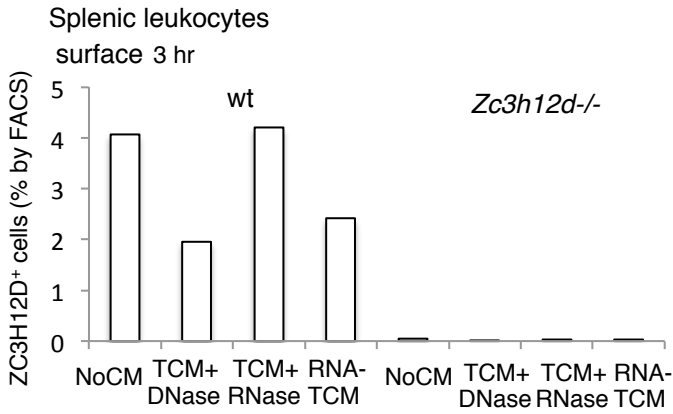

## Figure 1h

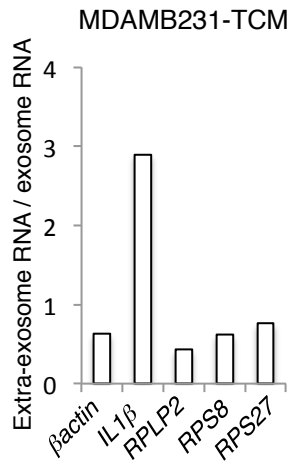

## Figure 1i

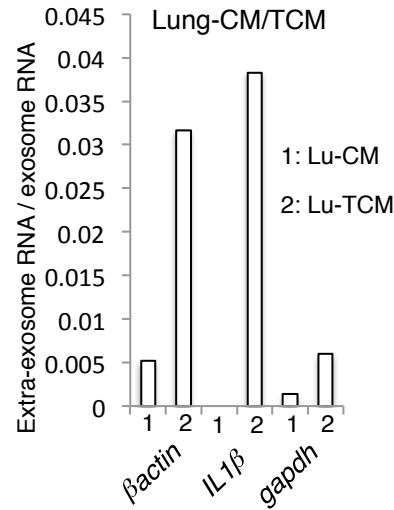

## Figure 1j Tumor-bearing mouse serum

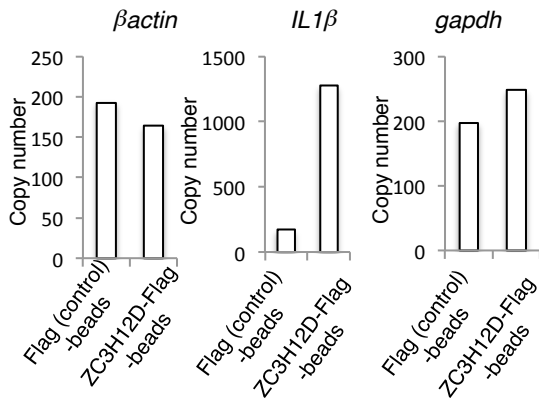

## Figure 2b

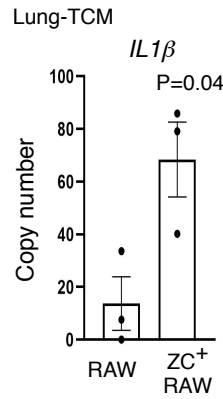

## Figure 3a

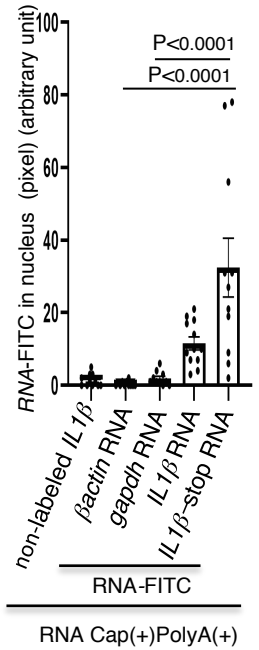

## Figure 5f

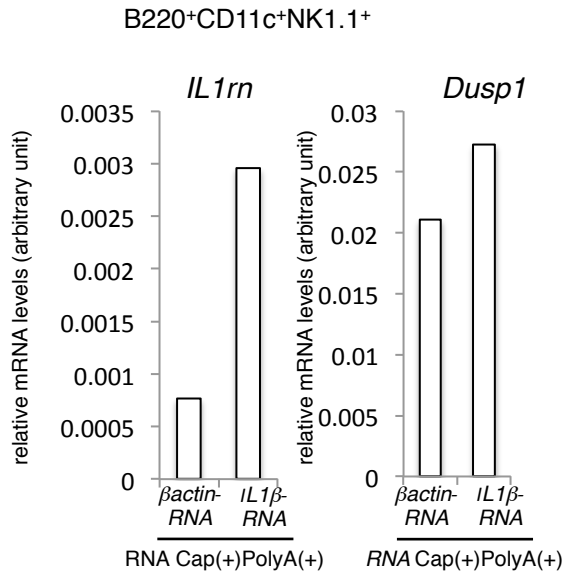

Repeated experiment data for Figures 1d and h to j, 2b, 3a, and 5f. These data show that the key points (*IL-1beta* in Figure 1i and j and 2b) were reproduced. (n = 3 biologically independent samples in Figure 2b-repeated data; n=11, 10, 10, 12 and 11 cells for nonlabeled *IL1beta*-RNA, FITC-labeled *-betaactin*-RNA, *gapdh*-RNA, *IL1beta*-RNA and *IL1beta*-stop-RNA, respectively in Figure 3a-repeated data) In the graphs, averages  $\pm$  SEM and the results of a Student's t-test or one-way ANOVA with Bonferroni correction are shown. The P values are shown in the figure.

## Supplementary Figure 10 -Gating strategy and validation of anti-ZC3H12D antibody

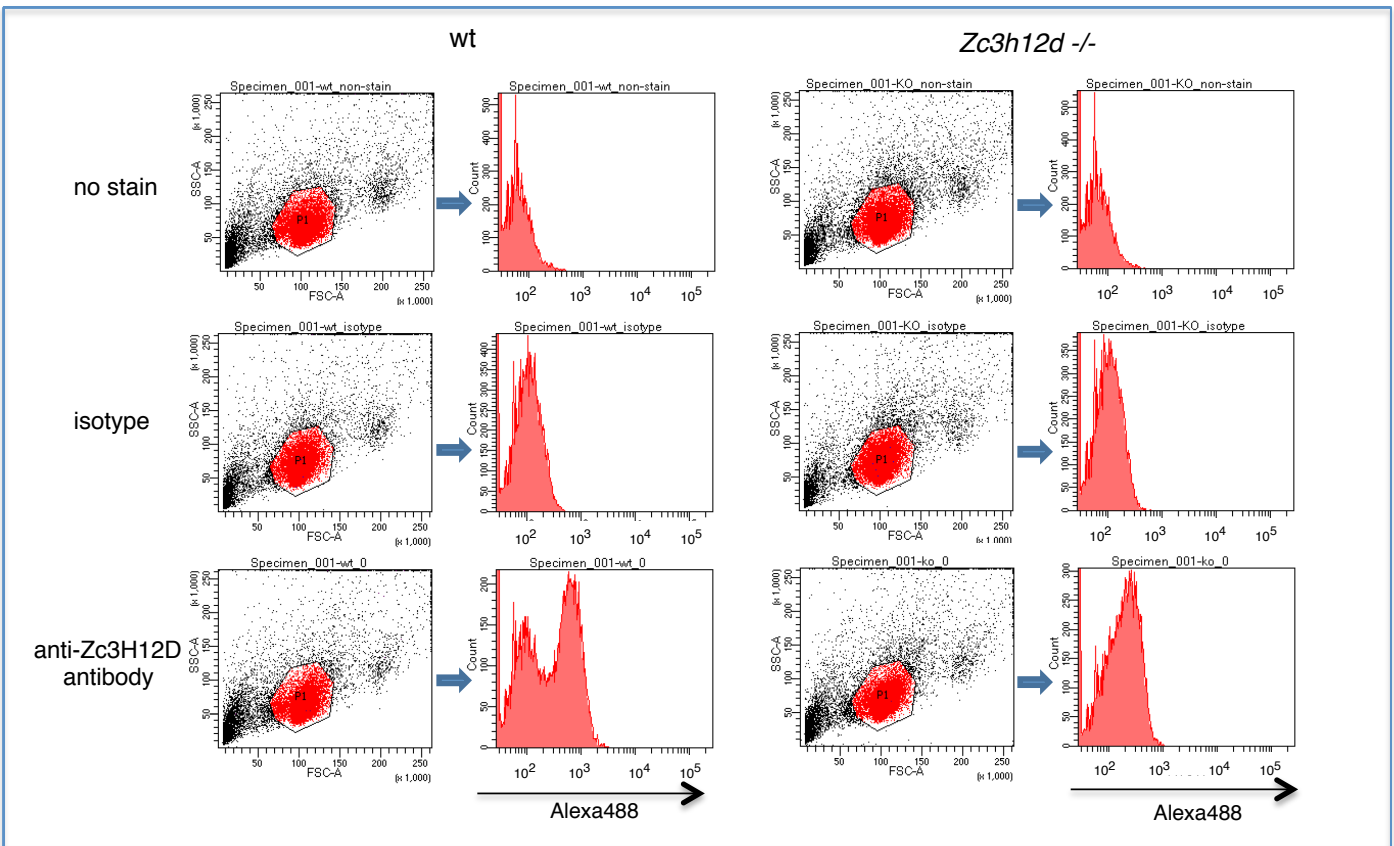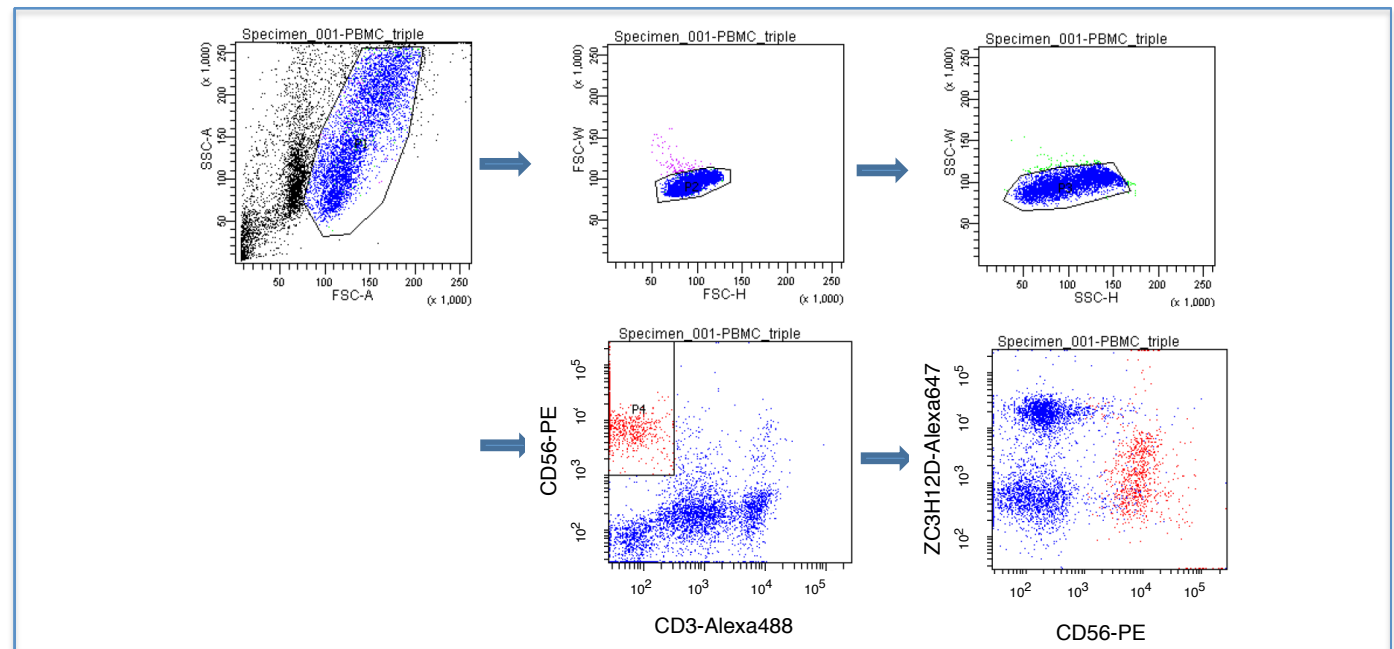

ZC3H12D antibody validation and gating strategy for the mouse samples related to Figure 1a and 1d (top panel). Wild-type mouse spleen cells were analyzed by flow cytometry: (top) no primary antibody, (middle) isotype control, and (bottom) anti-ZC3H12D are shown in left. ZC3H12D knockout mouse spleen cells were also analyzed: (top) no primary antibody, (middle) isotype control, and (bottom) anti-ZC3H12D are shown in right. Anti-Rabbit-IgG-Alexa 488 was used as secondary antibody in the analyses. The gating strategy for the human PBMC cells related to Figure 7a and Supplementary Figure 8 (bottom panel).

## SupplementaryTable 1

| lung > liver   |             |
|----------------|-------------|
| Gene symbol    | Fold change |
| Zc3h12a        | -0.42       |
| Zc3h12c        | -1.87       |
| <b>Zc3h12d</b> | 6.19        |

**Gene expression of ZC3H12 family in relocated B220<sup>+</sup>CD11c<sup>+</sup>NK1.1<sup>+</sup>NK cells derived from TCM-stimulated lungs and livers.** *Zc3h12d* showed the highest upregulation in B220<sup>+</sup>CD11c<sup>+</sup>NK1.1<sup>+</sup>NK cells that migrated from the liver to the lung compared to those that stayed in the liver in TCM-stimulating mice. (Microarray data were deposited in GSE76235.) As shown in Table S3, *Zc3h12b* might be low. To perform this microarray analysis, cDNAs obtained from five mice were combined before the hybridization process. The fold changes of mRNA levels in lung versus liver were shown.

## SupplementaryTable 2

| Gene accession     | Gene symbol | gene expression value |
|--------------------|-------------|-----------------------|
| NM_007393          | <b>Actb</b> | 999949                |
| NM_001033261       | Zfc3h1      | 999949                |
| NM_011664          | Ubb         | 684039                |
| ENSMUST00000082392 | ND1         | 528615                |
| NM_011359          | Sftpc       | 387841                |
| NM_008361          | <b>Il1b</b> | 377199                |
| NM_013647          | Rps16       | 239062                |
| NM_001252218       | Rpl31       | 60126                 |
| NM_008503          | Rps2        | 51180                 |
| NM_011296          | Rps18       | 49266                 |
| NM_007621          | Cbr2        | 38421                 |
| NM_010106          | Eef1a1      | 37956                 |
| NM_029751          | Rpl18a      | 33092                 |
| NM_012053          | Rpl8        | 21974                 |
| NM_011681          | Scgb1a1     | 19695                 |
| NM_011295          | Rps12       | 15829                 |
| NM_016959          | Rps3a1      | 15709                 |
| NM_011029          | Rpsa        | 15285                 |
| NM_009975          | Csnk2b      | 14793                 |
| NM_001033865       | Rps27a      | 14033                 |

**nex-mRNA in CM of lung culture with TCM.** A list of top 20 RNA in lung CM, which was stimulated by TCM, including *βactin* and *IL1β*. (Microarray data were deposited in GSE161219.)

### SupplementaryTable 3

| Gene symbol | Gene Description                     | Wt signal   | Homo signal | Fold change | mRNA Accession     |
|-------------|--------------------------------------|-------------|-------------|-------------|--------------------|
| Igkv6-32    | immunoglobulin kappa variable 6-32   | 975.974741  | 6605.170101 | 6.767767467 | ENSMUST00000103377 |
| Ighv5-17    | immunoglobulin heavy variable 5-17   | 1067.669936 | 4406.477124 | 4.127190412 | ENSMUST00000103459 |
| Igkv11-125  | immunoglobulin kappa variable 11-125 | 415.294225  | 1356.365238 | 3.266034431 | ENSMUST00000103311 |
| Igkv5-48    | immunoglobulin kappa variable 5-48   | 1415.85715  | 4314.207943 | 3.047064417 | ENSMUST00000103364 |
| Igkv8-19    | immunoglobulin kappa variable 8-19   | 876.834042  | 2380.105816 | 2.714431355 | ENSMUST00000103389 |
| Retnlg      | resistin like gamma                  | 338.4549484 | 844.3632628 | 2.494758214 | NM_181596          |
| <b>Il1b</b> | interleukin 1 beta                   | 594.4451965 | 1445.346817 | 2.431421476 | NM_008361          |
| Ighv1-67    | immunoglobulin heavy variable V1-67  | 688.7182039 | 1665.996899 | 2.418981943 | ENSMUST00000103538 |
| Mmp8        | matrix metalloproteinase 8           | 111.8785771 | 242.8362518 | 2.170533967 | NM_008611          |
| Igkv14-111  | immunoglobulin kappa variable 14-111 | 1369.591559 | 2914.211763 | 2.127796235 | ENSMUST00000103320 |
| LOC238440   | Ig heavy chain V region              | 998.7432241 | 2002.43542  | 2.004955199 | ENSMUST00000103529 |

|         |                                      |             |             |             |              |
|---------|--------------------------------------|-------------|-------------|-------------|--------------|
| Zc3h12a | zinc finger CCCH type containing 12A | 247.9834447 | 232.5585224 | 0.93779858  | NM_153159    |
| Zc3h12b | zinc finger CCCH-type containing 12B | 43.30825084 | 43.92681522 | 1.01428283  | NM_001034907 |
| Zc3h12c | zinc finger CCCH type containing 12C | 222.2839543 | 242.7790293 | 1.092202224 | NM_001162921 |
| Zc3h12d | zinc finger CCCH type containing 12D | 692.4710751 | 142.0219391 | 0.205094399 | NM_172785    |

**List of the candidate genes that might be regulated by Zc3h12d.** Gene expression level that was upregulated in *Zc3h12d*<sup>-/-</sup> mouse spleen compared to that of wild-type shown as fold changes. IL-1 $\beta$  is marked red (top). Zc3h12 family genes in this array data are shown (bottom). (Microarray data were deposited in GSE104002.) Note that *beta*actin did not change between wild-type and *Zc3h12d*<sup>-/-</sup> mice.

### SupplementaryTable 4

| Gene symbol | Gene Description                              | Wt signal   | Homo signal | Z-score     | Fold change | mRNA Accession |
|-------------|-----------------------------------------------|-------------|-------------|-------------|-------------|----------------|
| Dusp1       | dual specificity phosphatase 1                | 441.6653981 | 754.3132721 | 4.774505525 | 1.707884012 | NM_013642      |
| Errfi1      | ERBB receptor feedback inhibitor 1            | 207.7234094 | 346.1635474 | 4.566267614 | 1.666463825 | NM_133753      |
| S100a8      | S100 calcium binding protein A8               | 985.0751638 | 1635.855952 | 3.577577454 | 1.660640743 | NM_013650      |
| S100a9      | S100 calcium binding protein A9               | 1440.416185 | 2384.944536 | 3.557300138 | 1.655732948 | NM_001281852   |
| Il1rn       | interleukin 1 receptor antagonist             | 92.51978447 | 151.6939776 | 4.031669422 | 1.639584209 | NM_001039701   |
| Nlrp12      | NLR family, pyrin domain containing 12        | 62.59128977 | 97.20307171 | 4.061129896 | 1.552980807 | NM_001033431   |
| Cebpd       | CCAAT/enhancer binding protein (C/EBP), delta | 112.6989294 | 171.1550441 | 3.390912832 | 1.518692724 | NM_007679      |

**List of the genes that were candidate with upregulation in cell nucleus derived from TCM-stimulated mouse spleen.** Those were known as nucleus components classified by GO. The fold changes of the gene expression level of *Zc3h12d*<sup>-/-</sup> mice dividing by that of wild-type. (Microarray data were deposited in GSE104002.)

## Supplementary Table 5

### Quantitative PCR primers

| name                                               | RefSeq accession | Sequence                                                                                                          |
|----------------------------------------------------|------------------|-------------------------------------------------------------------------------------------------------------------|
| Mouse CCAAT/enhancer binding protein delta (Cebpd) | NM_007679        | Taqman probe: Mm00786711_s1                                                                                       |
| Human interleukin 1 beta (IL1b)                    | NM_000576        | Taqman probe: Hs01555410_m1                                                                                       |
| Human ACTB                                         | NM_001101        | Taqman probe: Hs01060665_g1                                                                                       |
| Human RPS27                                        | NM_001030        | Taqman probe: Hs01378332_g1                                                                                       |
| Human RPLP2                                        | NM_001004        | Taqman probe: Hs01115128_gH                                                                                       |
| Human RPS8                                         | NM_001012        | Taqman probe: Hs01374307_g1                                                                                       |
| Mouse IL1b                                         | NM_008361        | Taqman probe: Mm00434228_m1                                                                                       |
| Mouse Actb                                         | NM_007393        | Taqman probe: Mm00607939_s1                                                                                       |
| Mouse Zc3h12d                                      | NM_172785        | Taqman probe: Mm01191870_m1                                                                                       |
| Human IL1b                                         | NM_000576        | Forward: CCCTAACAGATGAAGTGCTCC<br>Reverse: ATCTTCCTCAGCTTGCCATG<br>Probe: AATCTCCGACCACCACTACAGCAAG               |
| Mouse Dusp 1                                       | NM_013642        | Forward: TGTGCCTGACAGTGCAGAAT<br>Reverse: CCTTCCGAGAAGCGTGATAG                                                    |
| Mouse Errfi 1                                      | NM_133753        | Forward: GATGCTCGGGCCCCAAG<br>Reverse: CAAATTTGTAAAGCCCAGGTG                                                      |
| Mouse Nlrp12                                       | NM_001033431     | Forward: TCCAGACTCAGTCCACATACT<br>Reverse: GATCAGGTTGGAGTTGGTACAG                                                 |
| Mouse S100A8                                       | NM_013650        | Forward: CCGTCTTCAAGACATCGTTTGA<br>Reverse: GTAGAGGGCATGGTGATTTCTT                                                |
| Mouse S100A9                                       | NM_009114        | Forward: GTCCAGGTCCTCCATGATGT<br>Reverse: GAAGGAAGGACACCCTGACA                                                    |
| HOX transcript antisense (Hotair)                  | NR_047528        | Forward: GCTAAGTCCTTCCAGAGAGAAAAG<br>Reverse: GCTCTTACTCTCTGCTTTAC                                                |
| gene-specific primers for mouse IL1b               | NM_008361        | mIL1b-621R: CCCAAGGCCACAGGTATTT<br>mIL1b-921R: TTAGAAACAGTCCAGGCCATAC<br>mIL1b-1195R: GTTGACAGCTAGGTTCTGTTCT      |
| Mouse Mmp8                                         | NM_008611        | Forward 5'-CCAGCACCTATTTACTACCTC-3'<br>Reverse 5'-AGCATCAAATCTCAGGTGGG-3'<br>Probe 5'-ACCTTCAGACAACCCCATCCAACC-3' |
| Mouses Retnlg                                      | NM_181596        | Forward 5'-TGTCCTCCACTGTAACAAAG-3'<br>Reverse 5'-GGCAAGTATTTCCATCCCGG-3'<br>Probe 5'-CCAAGATCCACAGCCATAGCCACA-3'  |
| Mouse Ighv5-17                                     |                  | Forward 5'-GAGTGGCAAGGAGTTCAAATG-3'<br>Reverse 5'-TTTCCTGGACAACCTGCTCTG-3'<br>Probe 5'-TCTCGATGGGTGATGGGAGGTCT-3' |
| Mouse Gapdh                                        | NM_008084        | Forward 5'-CTTTGTCAAGCTCATTTCTGG-3'<br>Reverse 5'-TCTTGCTCAGTGTCTTGC-3'<br>Probe 5'-CACCTGTTGCTGTAGCCGATTCA-3'    |

### List of primers used for qPCR
